# Supplementary material
Source: ML conference proceedings conference paper supplement (https://openaccess.thecvf.com/content/ICCV_2019/html/Jiang_Linearized_Multi-Sampling_for_ICCV_2019_paper.html)
Supplement: Supplementary file 1 [file Jiang_Linearized_Multi-Sampling_for_ICCV_2019_supplemental.zip]

Archive with 9 entries (6 files):
- 0811-supp/
- 0811-supp/teaser.mp4
- 0811-supp/README.html
- __MACOSX/
- __MACOSX/0811-supp/
- __MACOSX/0811-supp/._README.html
- 0811-supp/appendix.pdf
- __MACOSX/0811-supp/._appendix.pdf
- 0811-supp/video_abstract.mp4
