# Supplementary material
Source: ML conference proceedings conference paper supplement (https://openaccess.thecvf.com/content/ICCV_2019/html/Jiang_Linearized_Multi-Sampling_for_ICCV_2019_paper.html)
Supplement: Supplementary file 1 [file Jiang_Linearized_Multi-Sampling_for_ICCV_2019_supplemental.zip › 0811-supp/README.html]

---

## Linearized Multi-Sampling for Differentiable Image Transformation

Wei Jiang, Weiwei Sun, Andrea Tagliasacchi, Eduard Trulls, Kwang Moo Yi

---

Qualitative Highlights:

We show
qualitative examples highlighting the impact of our method on image
alignment. To align images, we directly optimize a Spatial Transformer
Network [**14**] to output a
32x32 image, and minimize the L2 distance between the output image and
a target image. Please see paper for details.

[

Your browser does not support HTML5 video. To see this video, please
open teaser.mp4 (see bellow for details on the codec
to use).
](teaser.mp4)


---

Video Abstract:

This video is a quick abstract of our method. Please see paper for
details.

[

Your browser does not support HTML5 video. To see this video, please open
video\_abstract.mp4 (see bellow for details on the codec to use).
](video_abstract.mp4)
  
  

---

Supplementary Appendix:

Supplementary appendix is available here

---

Reference:

[**14**] &nbspM. Jaderberg,
K. Simonyan, A. Zisserman, and K. Kavukcuoglu. "Spatial Transformer
Networks."" NIPS, pages 2017-2025, 2015

---

The supplementary videos are encoded by FFMPEG with h.264 codec. If
you can't play the video, please download the VLC player
at: http://www.videolan.org/vlc/index.html
